# Supplementary material for: Recognition of centromere‐specific histone Cse4 by the inner kinetochore Okp1‐Ame1 complex
Source: PubMed Central journal article supplement (PMC10702835; doi:10.15252/embr.202357702), 2023-11-20
Supplement: EMBR-24-e57702-s008.pdf [file EMBR-24-e57702-s008.pdf]

## Expanded View Figures

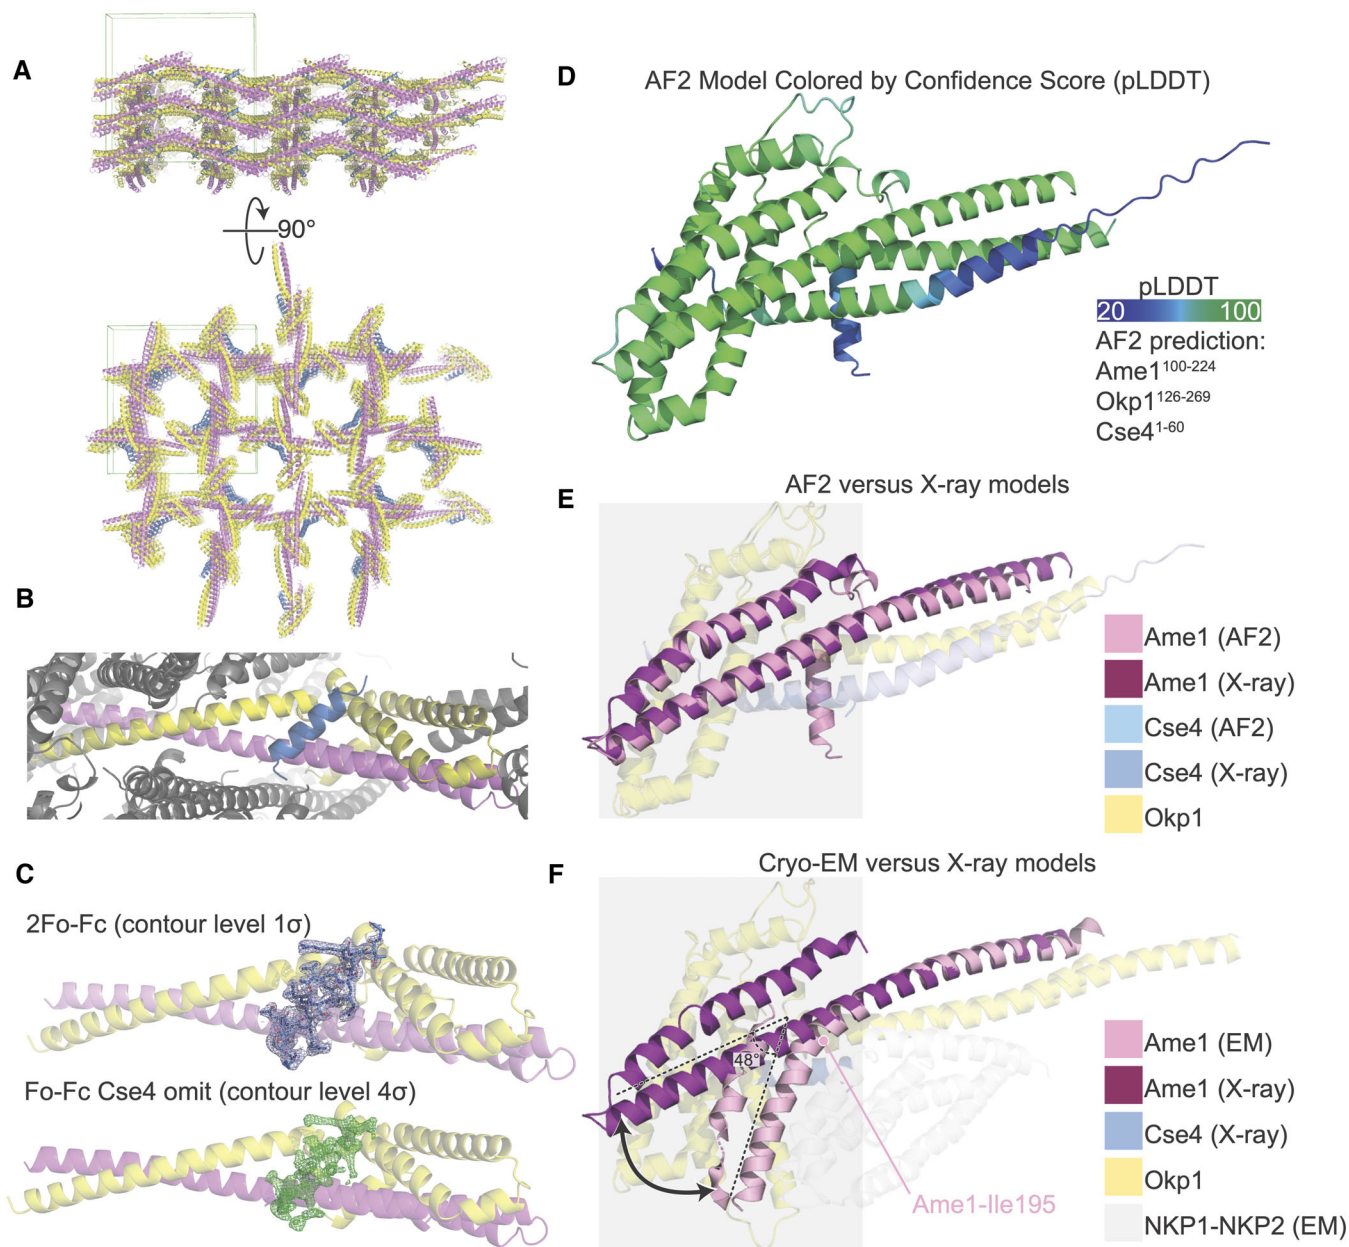

**Figure EV1. Crystal structure of Okp1-Ame1-Cse4<sup>END</sup> and flexibility at the Okp1-Ame1 head-coiled-coil joint and Nkp1-Nkp2 position.**

**A** The crystal structure of Okp1-Ame1-Cse4 colored as in Fig 1. The green box shows the limits of a single unit cell.

**B** Close-up view of an individual biological protomer. Okp1-Ame1-Cse4 colored as in Fig 1. Neighboring protomers are colored gray.

**C** Cse4<sup>END</sup> peptide density from the final refined model (top; 2Fo-Fc) and from the refined model lacking Cse4<sup>END</sup> (bottom; Fo-Fc, Cse4 omitted).

**D** The structure of Okp1-Ame1-Cse4 as predicted by AlphaFold 2 (AF2) (Jumper et al, 2021). The model is colored according to confidence score (pLDDT) from low (blue) to high (green). The peptides used for prediction are given at right.

**E** Overlay of Okp1-Ame1-Cse4 from AF2 with the current Okp1-Ame1-Cse4 crystal structure (X-ray). Only Ame1 (magenta and pink) is shown as an opaque chain for clarity. The gray box marks the Okp1-Ame1 head domain.

**F** Overlay of the Okp1-Ame1-Cse4 structure from cryo-EM (EM) with the current crystal structure. The angle between the head and coiled coil shaft is indicated for the cryo-EM structure. Ame1-Leu195, which is the position at which Ame1 bends in the cryo-EM structure, is annotated. The Okp1-Ame1 head domain is marked as in panel E. Structures were aligned on the Okp1-Ame1 coiled coil shaft. The Nkp1-Nkp2 structure from cryo-EM (NKP1<sup>2-76</sup>; NKP2<sup>4-84</sup>) is shown as transparent gray chains.

**A**

**Okp1<sup>160-170</sup>**

|                     |       |                     |     |
|---------------------|-------|---------------------|-----|
|                     |       | 165                 | 170 |
| <i>S.cerevisiae</i> | G     | S I L R L L E T N T |     |
| <i>K.lactis</i>     | T N F | I D L I E N N I     |     |
| <i>S.paradoxus</i>  | E     | S I L R L L E T N T |     |
| <i>K.marxianus</i>  | T     | S F I E M I E N N V |     |
| <i>Z.rouxii</i>     | R     | S V V Q L I E T N F |     |
| <i>V.polyspora</i>  | D     | S I I E L L D I N F |     |
|                     |       | * * *               |     |

**Okp1<sup>230-250</sup>**

|                     |                                           |     |     |     |
|---------------------|-------------------------------------------|-----|-----|-----|
|                     | 235                                       | 240 | 245 | 250 |
| <i>S.cerevisiae</i> | R D L D I E Y I Y S K R Q F I Q N R Y S Q |     |     |     |
| <i>K.lactis</i>     | D N L N M E Y I Y A K G E S I K K R Y K S |     |     |     |
| <i>S.paradoxus</i>  | R D L D I E Y I Y S K R Q F I Q N R Y S Q |     |     |     |
| <i>K.marxianus</i>  | D N L D L E Y V Y A K G E F I K K R Y E S |     |     |     |
| <i>Z.rouxii</i>     | Y D V D I E Y I V S K R K Y I Q S Q Y A L |     |     |     |
| <i>V.polyspora</i>  | H D L D I E Y I F A K R K F I Q N R Y T Q |     |     |     |
|                     | * * * * *                                 |     |     |     |

**B**

**Ame1<sup>181-200</sup>**

|                     |                                         |     |     |     |
|---------------------|-----------------------------------------|-----|-----|-----|
|                     | 185                                     | 190 | 195 | 200 |
| <i>S.cerevisiae</i> | I S D Q M T R D L K D I L D I N V S N N |     |     |     |
| <i>K.Lactis</i>     | F L H Q S K E D L I T I S E L N L S N N |     |     |     |
| <i>S.paradoxus</i>  | I S D Q M T R D L K D I L D I N V S N N |     |     |     |
| <i>K.marxianus</i>  | F L Q Q C V Q D L S T L S D L N L S N N |     |     |     |
| <i>Z.rouxii</i>     | V S Q N L N S D L Q D I L D I N I S N N |     |     |     |
| <i>V.polyspora</i>  | V M K S M Q N D L K D I L D I N V S N N |     |     |     |
|                     | * * * * *                               |     |     |     |

**Figure EV2.** Protein sequence alignments for Okp1 and Ame1 covering the Cse4<sup>END</sup> contacts shown in Fig 2.

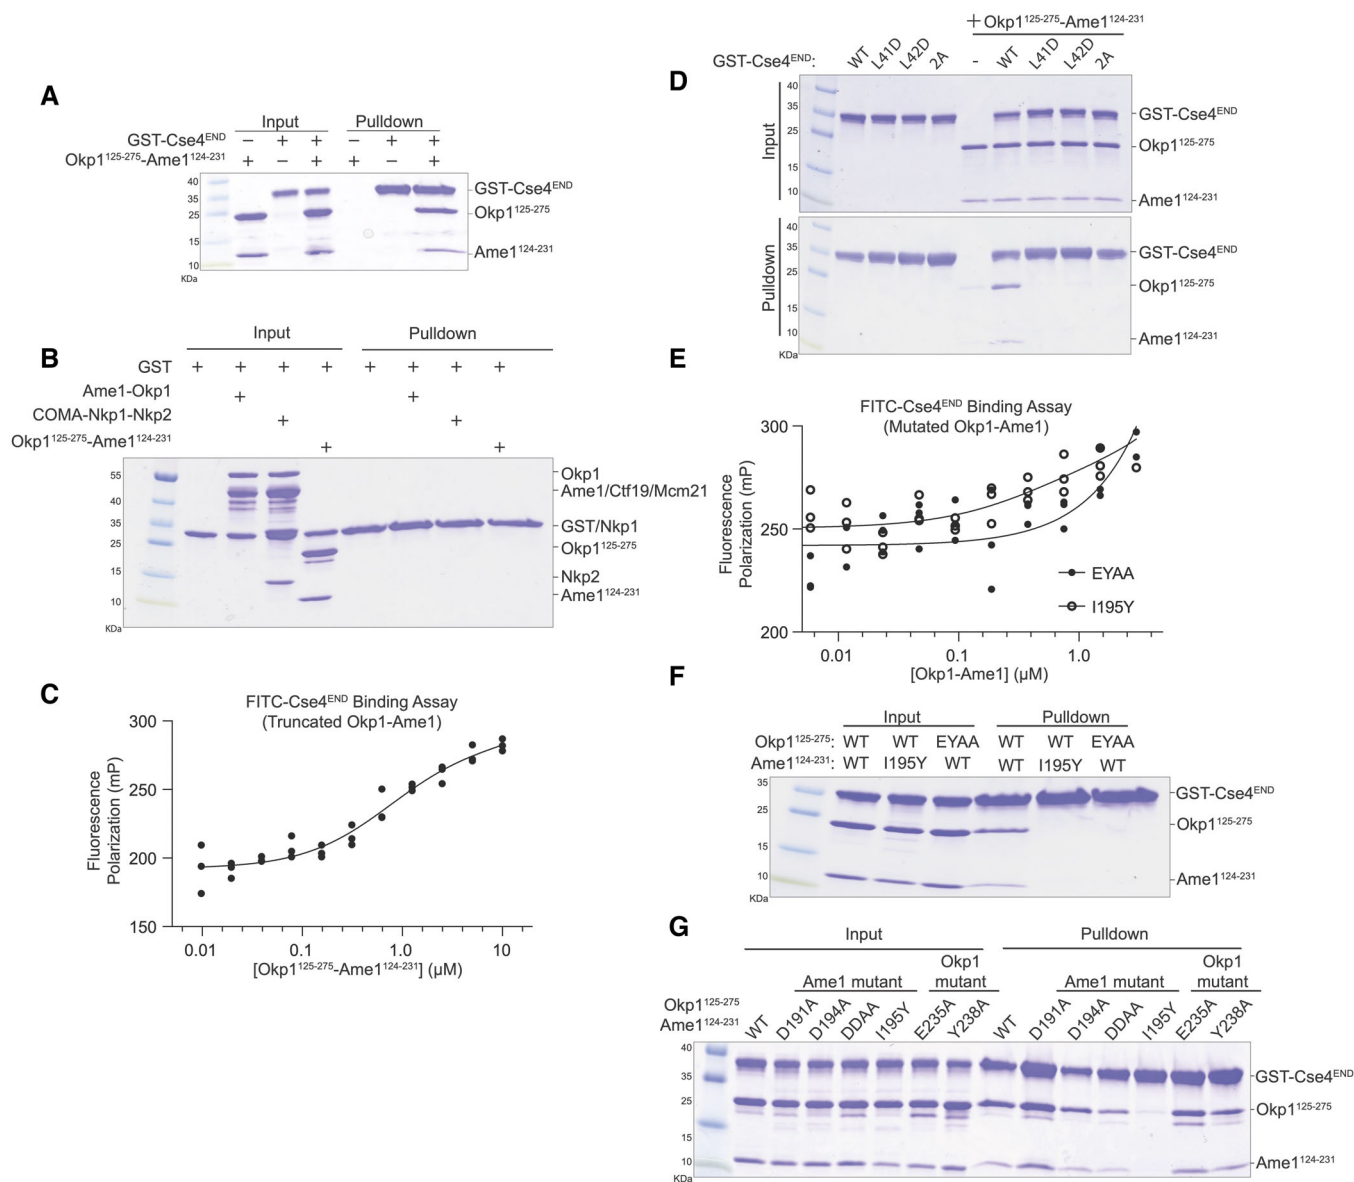

**Figure EV3. Further biochemical characterization of the Okp1-Ame1-Cse4<sup>END</sup> interaction.**

- A Pull-down assay showing binding between the truncated Okp1-Ame1 complex used for crystallography (Okp1<sup>125-275</sup>-Ame1<sup>124-231</sup>) and GST-Cse4<sup>END</sup>.
- B Recombinant proteins used for pull-downs in Fig 3 were tested for their association with GST to determine the level of non-specific binding. Results of a GST pull-down assay are shown.
- C The minimal Okp1-Ame1 complex used for crystallography was tested for its association with FITC-Cse4<sup>END</sup> in a fluorescence polarization experiment. The measured dissociation constant is ~750 nM (see [Materials and Methods](#);  $n = 3$  independent experiments).
- D GST-Cse4<sup>END</sup> and its mutants were tested for Okp1-Ame1 binding.
- E Full-length mutant Okp1-Ame1 complex (EYAA or I195Y as indicated) was tested for its association with FITC-Cse4<sup>END</sup>.
- F Various Okp1-Ame1 mutants (indicated above) were tested for binding to GST-Cse4<sup>END</sup>.
- G Various Okp1-Ame1 mutants were tested for Cse4<sup>END</sup> binding as in panel F.

Source data are available online for this figure.

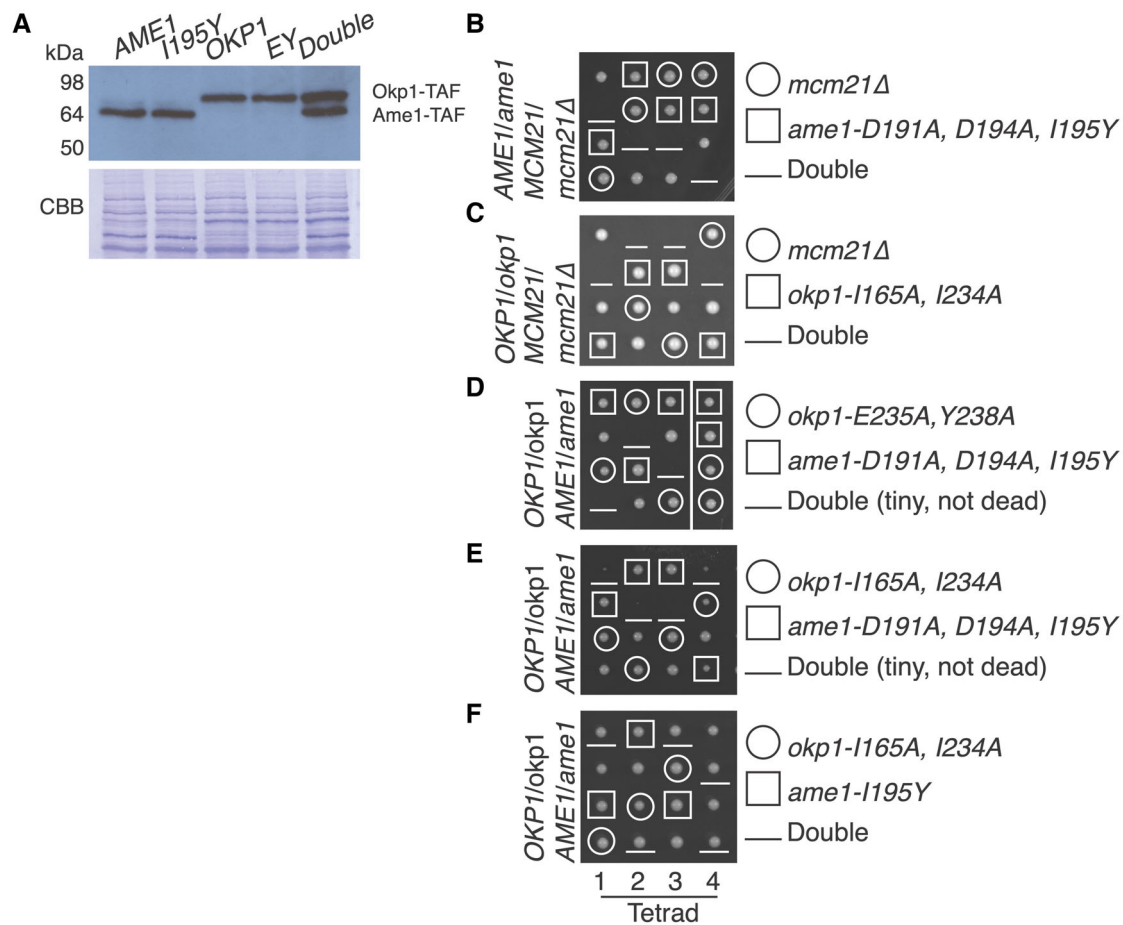

**Figure EV4. *In vivo* consequences of Okp1-Ame1 mutations.**

**A** Western blot showing expression of Ame1, Okp1, and their mutants in whole cell extracts (TAF – protein A-FLAG tag; anti-Protein A used for detection).  
**B–F** Tetrad dissection results as in Fig 4B–D. The mutants tested and the resulting spore genotypes are shown at right.

Source data are available online for this figure.

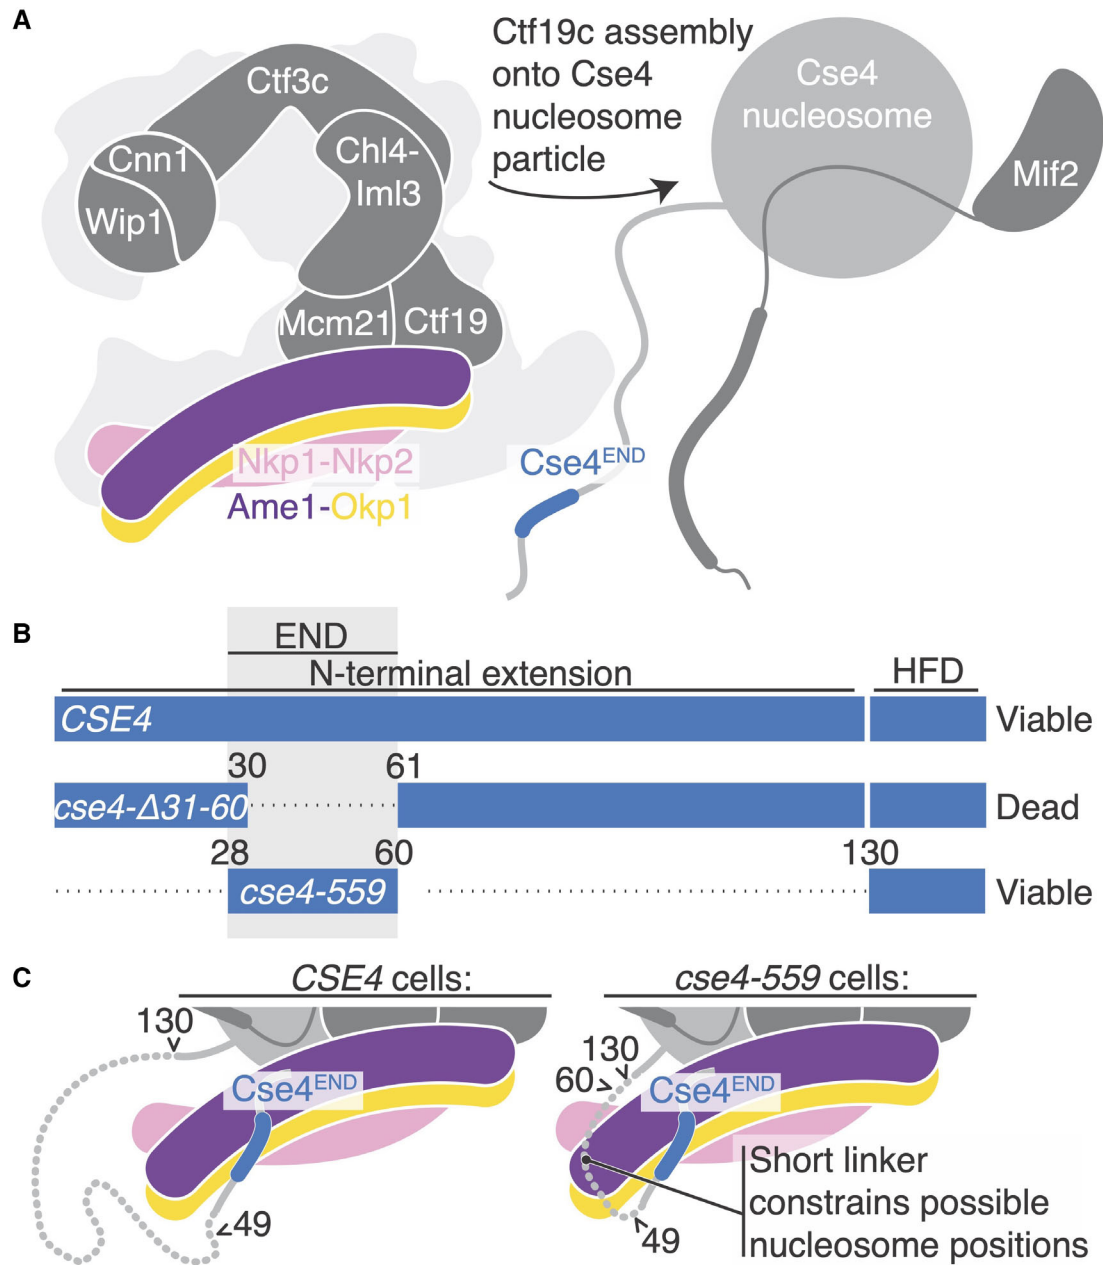

**Figure EV5. Model for Cse4 nucleosome contact by the Ctf19c and relation to *cse4* alleles.**

A Schematic showing Ctf19c assembly onto the Cse4-Mif2 complex. The assembly occurs via a largely unknown biochemical mechanism.

B *cse4* alleles (white text), their corresponding Cse4 proteins (blue bars), and their reported abilities to support cell viability (right). The alleles were reported by Chen *et al* (2000) and Fischbock-Halwachs *et al* (2019). The dotted lines indicate omitted fragments. The numbers correspond to full length Cse4. A gray box marks the boundaries of Cse4<sup>END</sup>, HFD – histone fold domain.

C Structural view of the Cse4 N-terminal extension in CSE4 (left) or *cse4-559* (right) cells. Arrows and nearby numbers point to Cse4 amino acid positions according to their numbering in the full-length protein.
